# Supplementary material
Source: PubMed Central journal article supplement (PMC4329107)
Supplement: NIHMS648364-supplement-03.pdf [file NIHMS648364-supplement-03.pdf]

868 **e-Xtra: Table S1: *R. solanacearum* strains used for genomic and functional analyses**

| Strain    | Phylotype-<br>sequevar | Host isolated<br>from     | Location              | Genome Reference                                      |
|-----------|------------------------|---------------------------|-----------------------|-------------------------------------------------------|
| GMI1000   | I                      | Tomato                    | French<br>Guiana      | (Boucher et al., 1985;<br>Salanoubat et al.,<br>2002) |
| FQY4      | I                      | Bacterial wilt<br>nursery | China                 | (Cao et al., 2013)                                    |
| Y45       | I                      | Tobacco                   | China                 | (Li et al., 2011)                                     |
| Grenada91 | IIA-6                  | Banana                    | Grenada               | Ailloud and Prior,<br>unpublished                     |
| UW181     | IIA-6                  | Plantain                  | Venezuela             | Ailloud and Prior,<br>unpublished                     |
| K60       | IIA-7                  | Tomato                    | USA                   | (Remenant et al.,<br>2012)                            |
| B50       | IIA-24                 | Banana                    | Brazil                | Ailloud and Prior,<br>unpublished                     |
| IBSBF1900 | IIA-24                 | Banana                    | Brazil                | (Wicker et al., 2007)                                 |
| CFBP2957  | IIA-36                 | Tomato                    | French West<br>Indies | (Remenant et al.,<br>2010)                            |

|           |       |           |             |                                   |
|-----------|-------|-----------|-------------|-----------------------------------|
| UW491     | IIB-1 | Potato    | Colombia    | Vinatzer,<br>unpublished          |
| UW551     | IIB-1 | Geranium  | Kenya       | (Gabriel et al., 2006)            |
| CFBP1416  | IIB-3 | Plantain  | Costa Rica  | Ailloud and Prior,<br>unpublished |
| CIP417    | IIB-3 | Banana    | Philippines | Ailloud and Prior,<br>unpublished |
| Molk2     | IIB-3 | Banana    | Philippines | Boucher et al.,<br>unpublished    |
| CFBP6783  | IIB-4 | Heliconia | West Indies | Ailloud and Prior,<br>unpublished |
| IBSBF1503 | IIB-4 | Cucumber  | Brazil      | Ailloud and Prior,<br>unpublished |
| Po82      | IIB-4 | Potato    | Mexico      | (Xu et al., 2011)                 |
| UW163     | IIB-4 | Plantain  | Peru        | Ailloud unpublished               |
| UW179     | IIB-4 | Banana    | Colombia    | Ailloud and Prior,<br>unpublished |
| CMR15     | III   | Tomato    | Cameroon    | (Remenant et al.,<br>2010)        |
| BDB R229  | IV    | Banana    | Indonesia   | (Remenant et al.,                 |

---

|                |    |        |           |                            |
|----------------|----|--------|-----------|----------------------------|
|                |    |        |           | 2011)                      |
| PSI07          | IV | Tomato | Indonesia | (Remenant et al.,<br>2010) |
| R. syzygii R24 | IV | Clove  | Indonesia | (Remenant et al.,<br>2011) |

---

869

870 **e-Xtra Table S2** can be downloaded at:871 [http://www.scientificsocieties.org/MPMIXtras/2014/MPMI-09-14-0292-FI\\_TableS2.xlsx](http://www.scientificsocieties.org/MPMIXtras/2014/MPMI-09-14-0292-FI_TableS2.xlsx)
